# Supplementary material for: Introgression of Chinese haplotypes contributed to the improvement of Danish Duroc pigs
Source: PubMed Central journal article supplement (PMC6346729; doi:10.1111/eva.12716), 2018-12-13

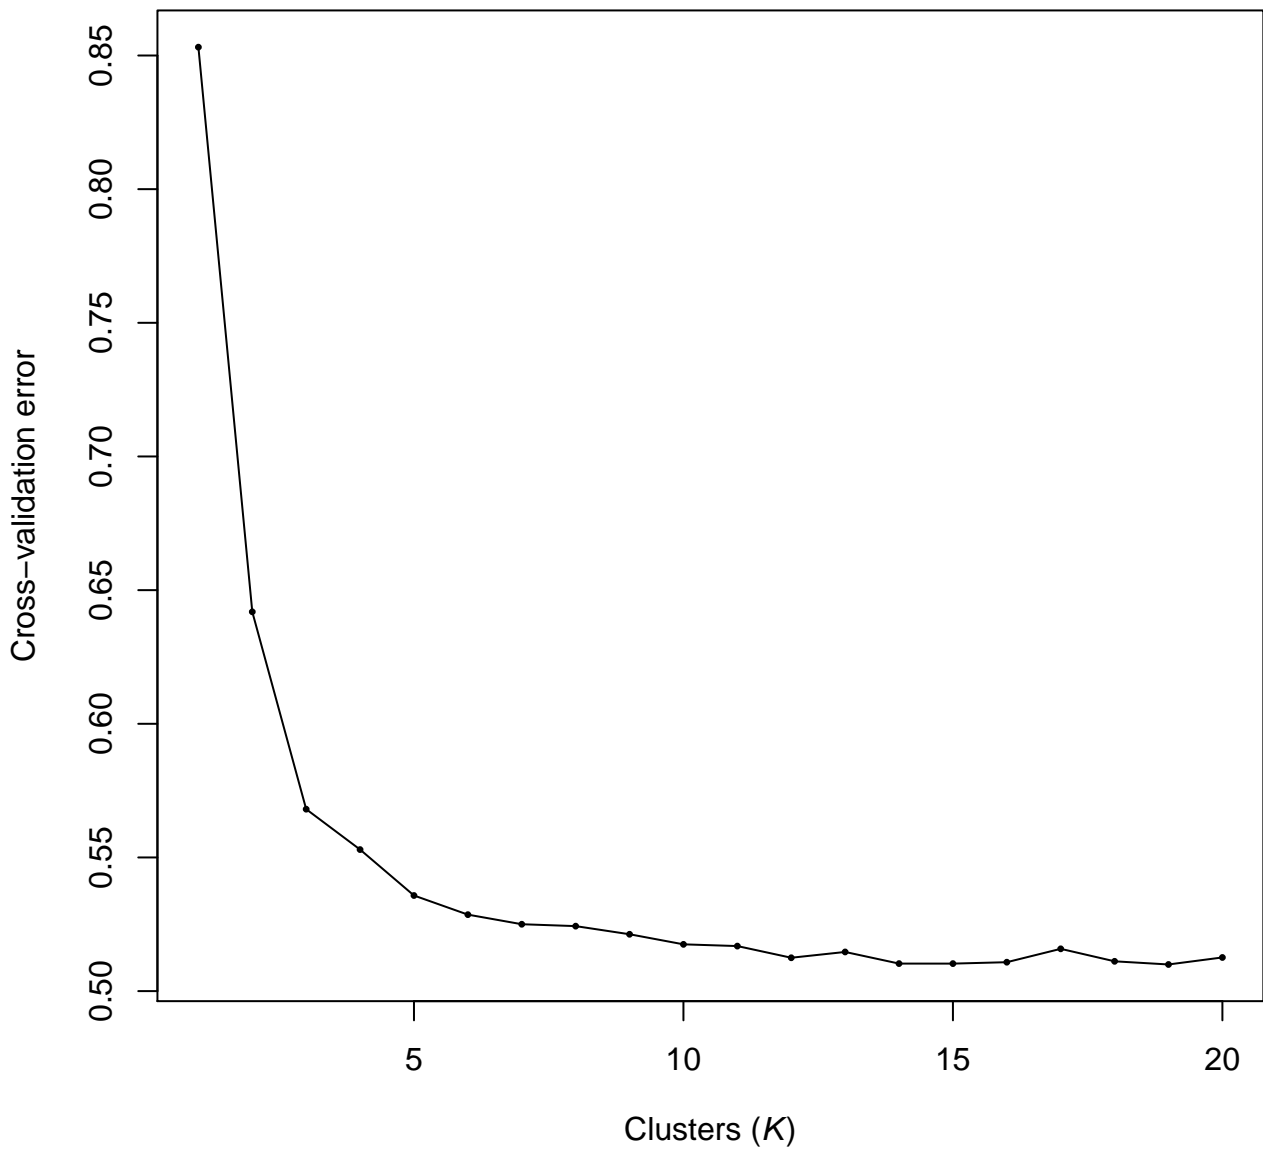

Supplement: EVA-12-292-s001.pdf [file EVA-12-292-s001.pdf]
