# Supplementary material for: Introgression of Chinese haplotypes contributed to the improvement of Danish Duroc pigs
Source: PubMed Central journal article supplement (PMC6346729; doi:10.1111/eva.12716), 2018-12-13

- DU
- EUW
- MS
- BMX
- TC
- JH
- WZS
- EHL
- LUC

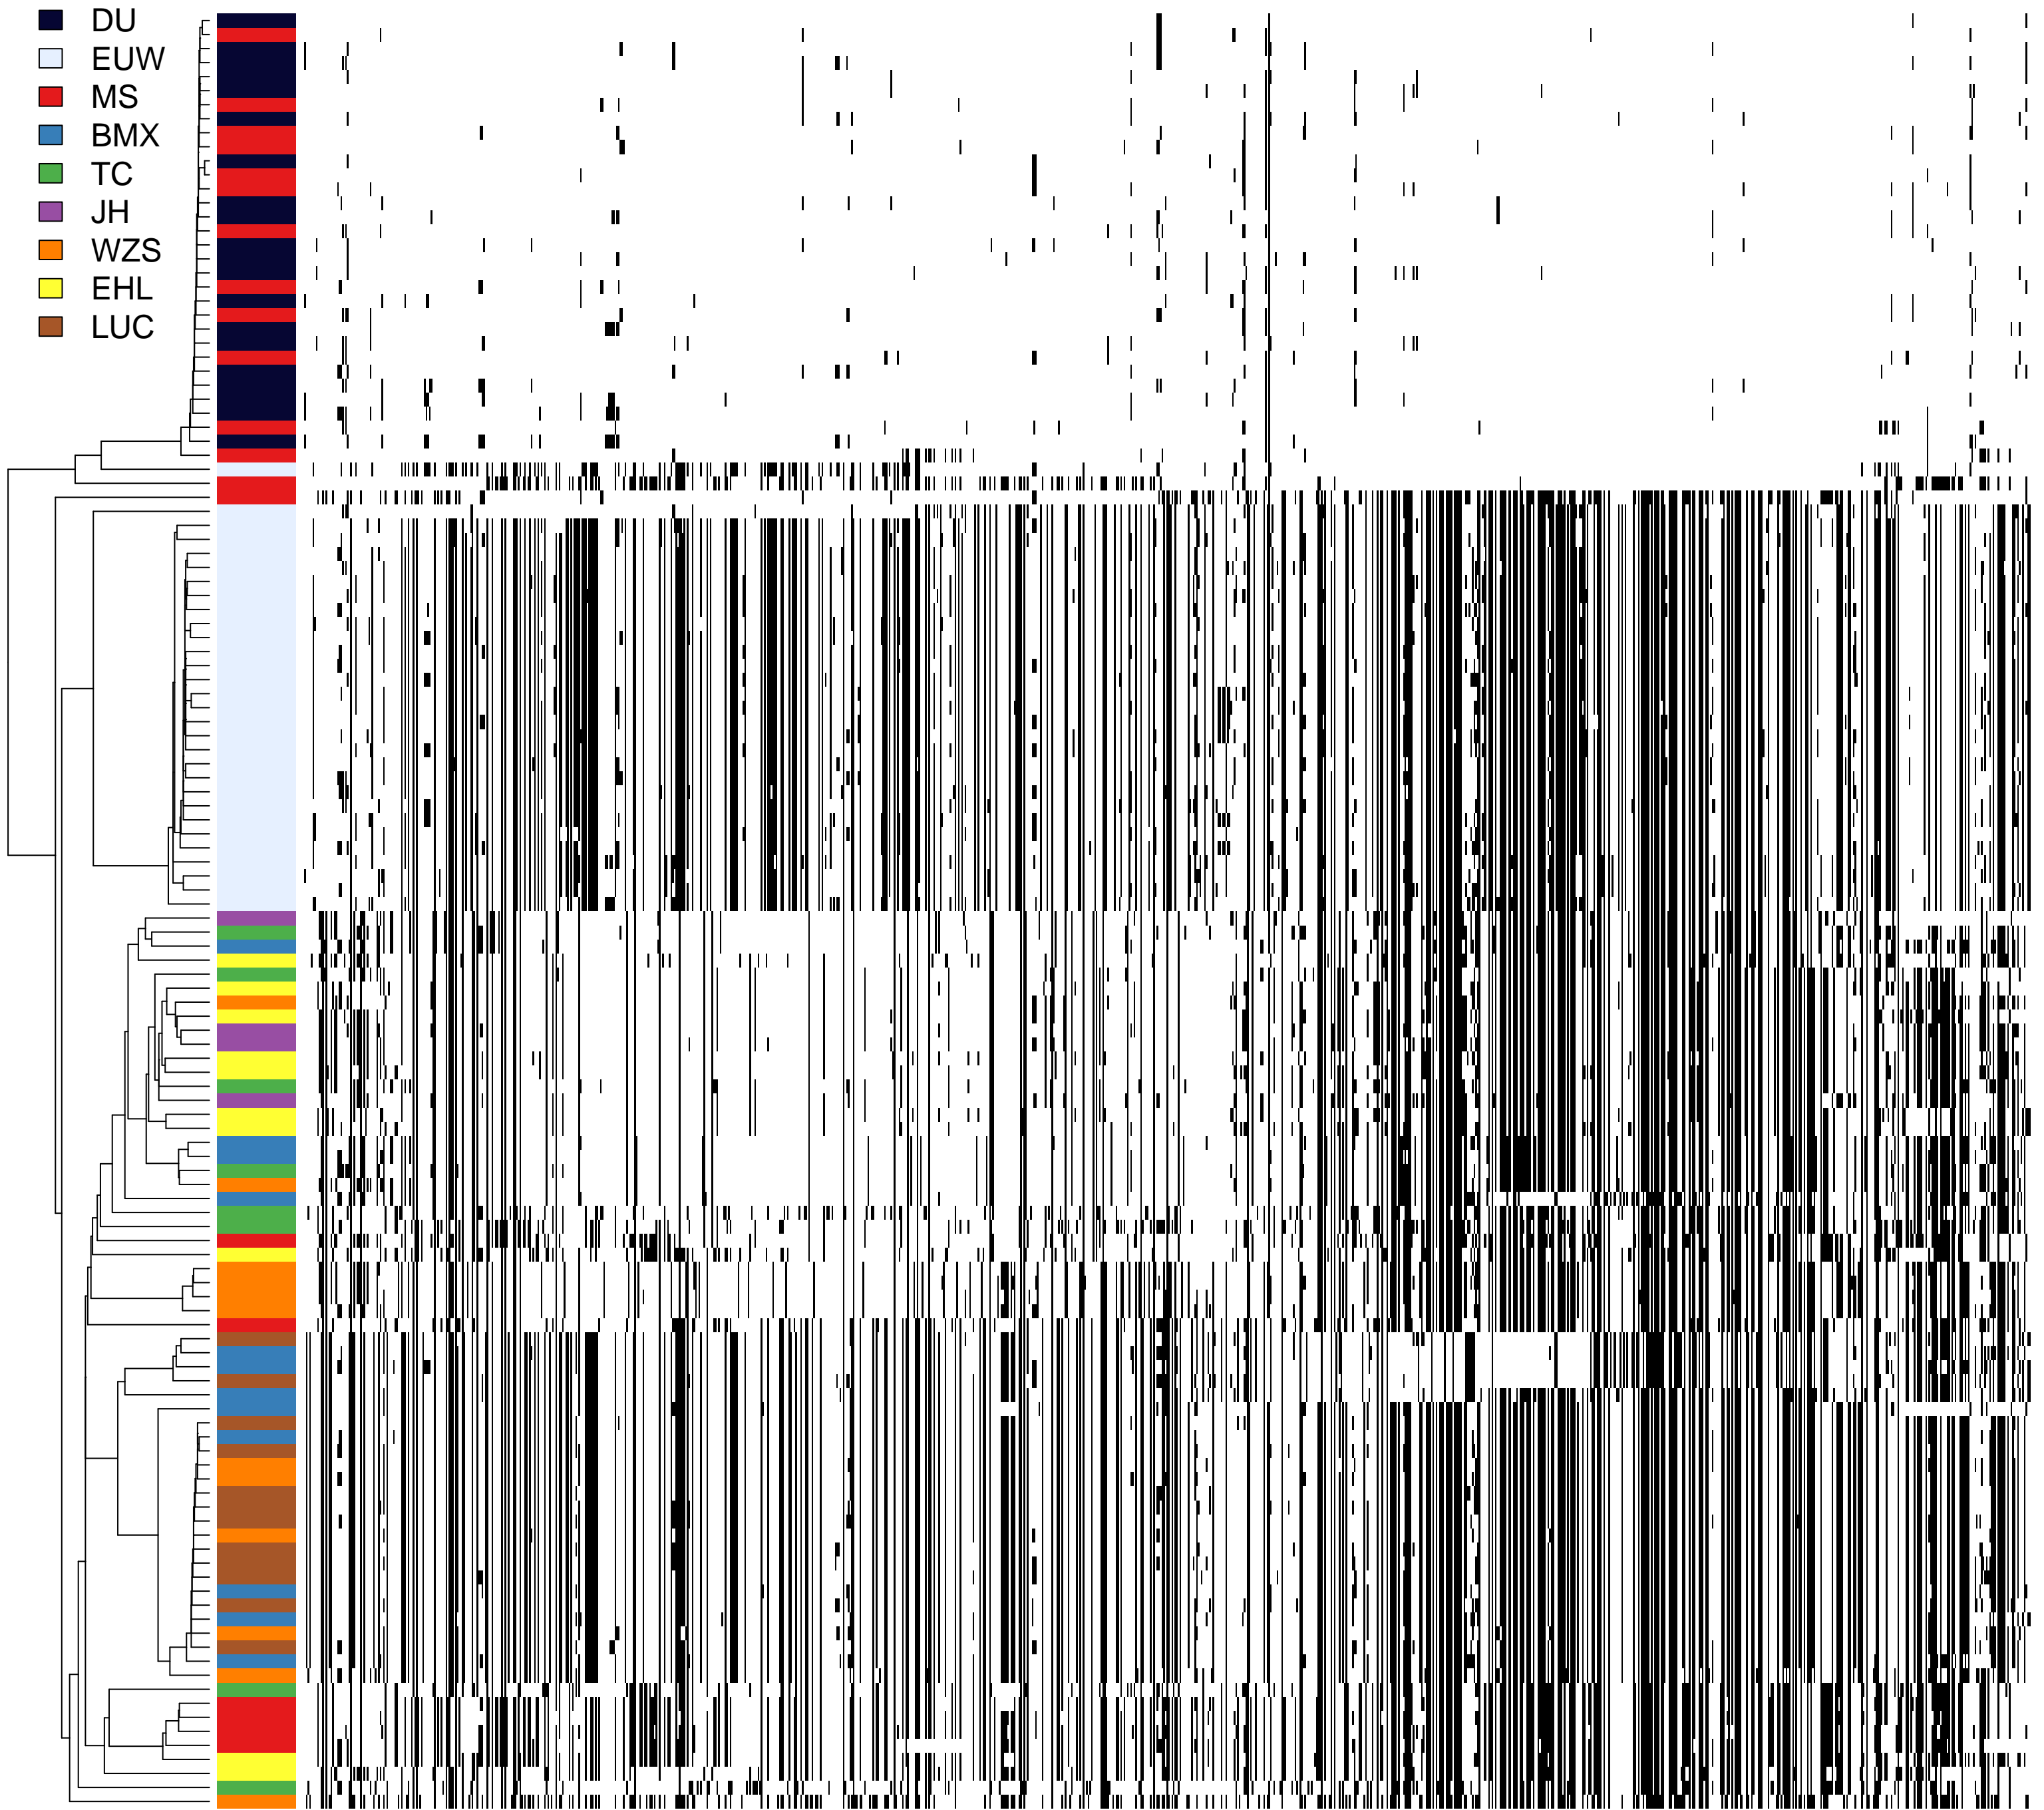

Supplement: EVA-12-292-s003.pdf [file EVA-12-292-s003.pdf]
